# Supplementary material for: Hydrogenolysis of glycerol in an aqueous medium over Pt/WO3/zirconium phosphate catalysts studied by 1H NMR spectroscopy
Source: Royal Society of Chemistry journal article supplement (doi:10.1039/d0nj05557c), 2021-01-01
Supplement: d0nj05557c1.pdf [file d0nj05557c1.pdf]

## Electronic Supplementary Information (ESI)

---

### Hydrogenolysis of glycerol in aqueous medium over Pt/WO<sub>3</sub>/zirconium phosphate catalysts studied by <sup>1</sup>H NMR spectroscopy

Susmita Bhowmik, Nagasuresh Enjamuri and Srinivas Darbha\*

*Catalysis and Inorganic Chemistry Division, CSIR-National Chemical Laboratory, Dr. Homi  
Bhabha Road, Pune-411008, India*

---

- T1** Catalytic activity data calculation sheet for hydrogenolysis of glycerol over 1Pt-8WO<sub>3</sub>/ZrP
- F1** XRD profiles of ZrP, 8WO<sub>3</sub>/ZrP, 2Pt/ZrP and 2Pt/8WO<sub>3</sub>/ZrP. The prominent peaks due to  $\gamma$ -WO<sub>3</sub> (\*) and metallic Pt (#) are marked.
- F2** Nitrogen adsorption-desorption isotherms of (a) 2Pt/ZrP, and (b) 2Pt/8WO<sub>3</sub>/ZrP.
- T2** N<sub>2</sub> physisorption data of ZrP samples.

**T1.** Representative catalytic activity data calculation sheet for hydrogenolysis of glycerol over 1Pt-8WO<sub>3</sub>/ZrP using <sup>1</sup>H NMR spectral data (Reaction conditions: Glycerol = 0.1 g, water = 3 g, catalyst = 0.1 g, hydrogen pressure = 40 bar, reaction temperature = 200 °C and reaction time = 12 h. 1,2-PDO = 1,2-propanediol, 1,3-PDO = 1,3-propanediol, 1-PO = 1-propanol and 2-PO = 2-propanol)

The following equations are used in the calculation:

$$\begin{aligned} & \text{Distribution of component Xi (mol \%)} \\ & = \frac{\text{Area of the peak of Xi (normalized to one proton)}}{\sum_{i=1}^n \text{Area of peak of Xi (normalized to one proton)}} \times 100 \end{aligned}$$

$$\begin{aligned} & \text{Glycerol conversion (mol \%)} \\ & = 100 - \text{Percentage distribution of glycerol in the reaction mixture} \end{aligned}$$

$$\text{Selectivity of component Xi (mol \%)} = \frac{\text{Percentage distribution of Xi in the product}}{\text{Percentage glycerol conversion}} \times 100$$

Turnover frequency (TOF) = moles of glycerol converted per mole of nominal Pt per hour

| Component | <sup>1</sup> H NMR peak position (ppm) | <sup>1</sup> H NMR Peak multiplicity | Number of equivalent protons | <sup>1</sup> H NMR peak integrated area | Peak area for one equivalent proton | Component distribution (mol%) |
|-----------|----------------------------------------|--------------------------------------|------------------------------|-----------------------------------------|-------------------------------------|-------------------------------|
| Glycerol  | 3.65-3.77                              | Multiplet                            | 1H (H <sub>c</sub> )         | 0.01                                    | 0.01                                | 7.69                          |
| 1,3-PDO   | 1.68-1.72                              | Multiplet                            | 2H (H <sub>b</sub> )         | 0.05                                    | 0.025                               | 19.23                         |
| 1,2-PDO   | 1.04-1.05                              | Doublet                              | 3H (H <sub>d</sub> )         | 0.09                                    | 0.03                                | 23.08                         |
| 1-PO      | 0.79-0.82                              | Triplet                              | 3H (H <sub>d</sub> )         | 0.17                                    | 0.056                               | 43.58                         |
| 2-PO      | 1.08-1.09                              | Doublet                              | 6H (H <sub>a</sub> )         | 0.05                                    | 0.0083                              | 6.41                          |

$$\text{Glycerol conversion (mol\%)} = 100 - 7.69 = 92.30$$

Product selectivity (mol%):

$$1,3\text{-PDO selectivity (mol\%)} = (19.23/92.30) \times 100 = 20.83$$

$$1,2\text{-PDO selectivity (mol\%)} = (23.08/92.30) \times 100 = 25.0$$

$$1\text{-PO selectivity (mol\%)} = (43.58 / 92.30) \times 100 = 47.22$$

$$2\text{-PO selectivity (mol\%)} = (6.41/92.3) \times 100 = 6.94$$

$$1,3\text{-PDO}/1,2\text{-PDO molar ratio} = 20.83 / 25.0 = 0.83$$

$$\text{Moles of glycerol converted} = (0.1 \times 92.3) / (100 \times 92.09382) = 0.001$$

$$\text{Moles of nominal Pt in the catalyst} = (0.1 \times 1) / (100 \times 195.084) = 0.00000513$$

$$\text{TOF (h}^{-1}\text{)} = 0.001 / (0.00000513 \times 12) = 16.2$$

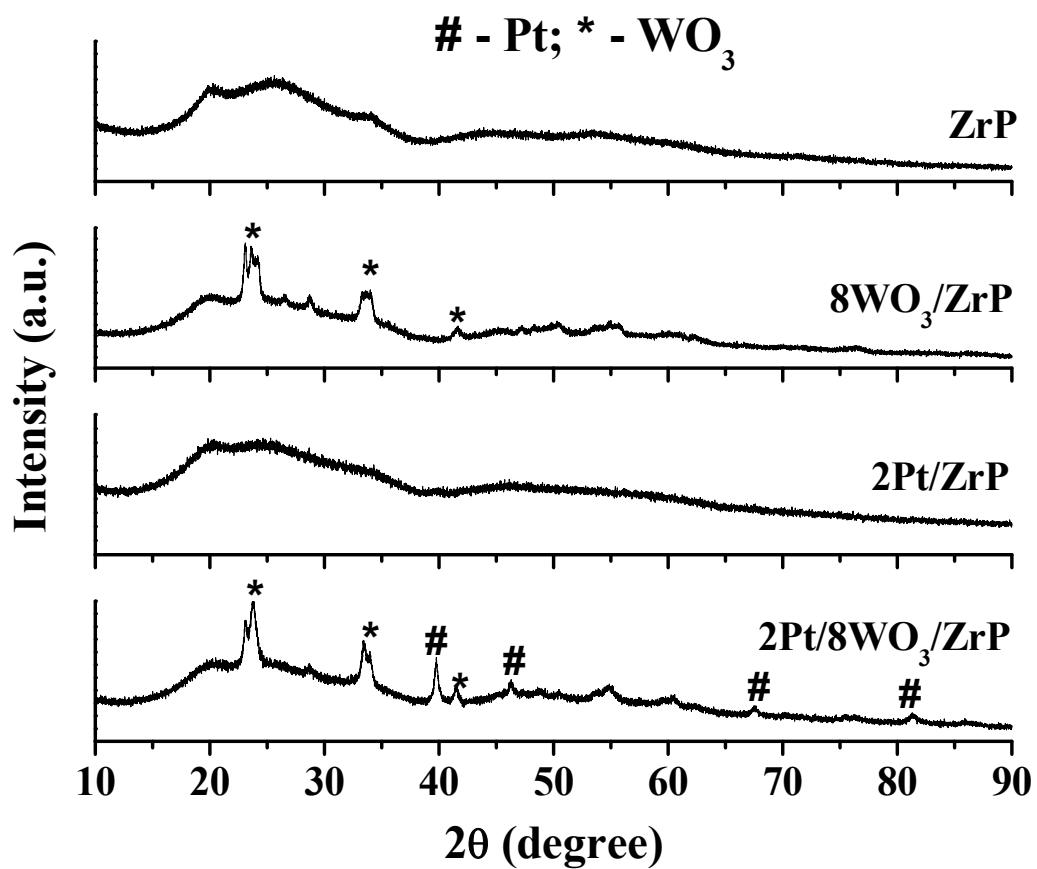

**F1.** XRD profiles of ZrP, 8WO<sub>3</sub>/ZrP, 2Pt/ZrP and 2Pt/8WO<sub>3</sub>/ZrP. The prominent peaks due to  $\gamma$ -WO<sub>3</sub> (\*) and metallic Pt (#) are marked.

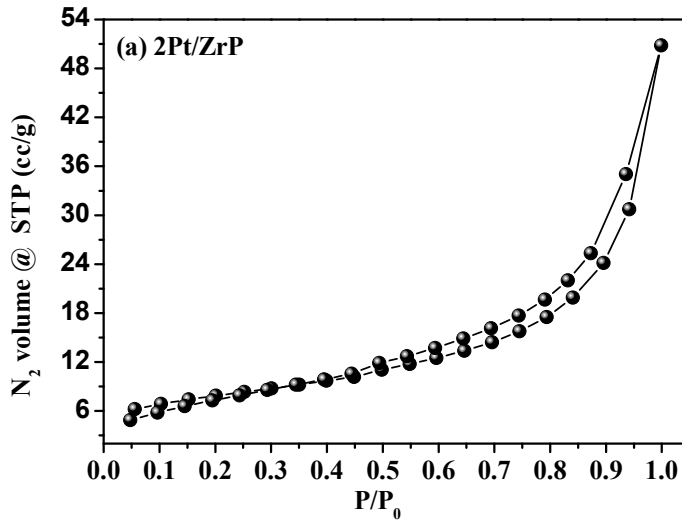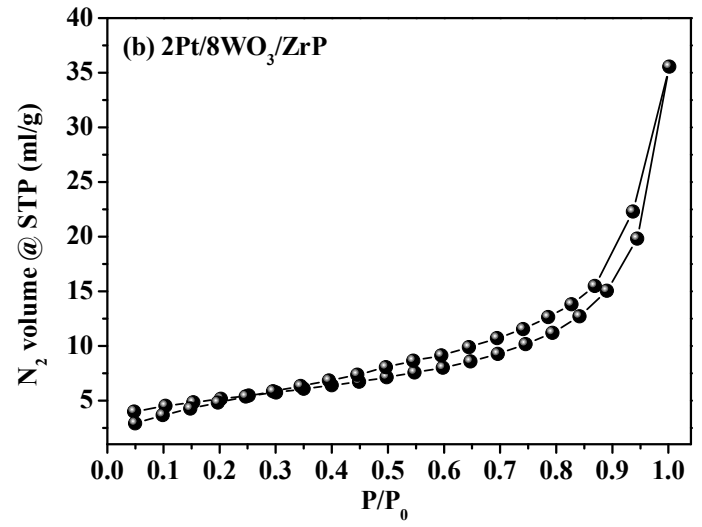

**F2.** Nitrogen adsorption-desorption isotherms of (a) 2Pt/ZrP, and (b) 2Pt/8WO<sub>3</sub>/ZrP.

**T2.** N<sub>2</sub> physisorption data of ZrP samples

| Catalyst                   | S <sub>BET</sub><br>(m <sup>2</sup> /g) | Total pore<br>volume (ml/g) | Average pore<br>radius (nm) |
|----------------------------|-----------------------------------------|-----------------------------|-----------------------------|
| ZrP                        | 13                                      | 0.04                        | 2.1                         |
| 8WO <sub>3</sub> /ZrP      | 21                                      | 0.06                        | 2.1                         |
| 1Pt/ZrP                    | 28                                      | 0.10                        | 1.7                         |
| 2Pt/ZrP                    | 27                                      | 0.08                        | 1.9                         |
| 1Pt/4WO <sub>3</sub> /ZrP  | 29                                      | 0.08                        | 1.7                         |
| 1Pt/8WO <sub>3</sub> /ZrP  | 18                                      | 0.06                        | 1.9                         |
| 1Pt/12WO <sub>3</sub> /ZrP | 19                                      | 0.07                        | 1.7                         |
| 2Pt/8WO <sub>3</sub> /ZrP  | 18                                      | 0.06                        | 1.9                         |
